# Supplementary material
Source: HighWire-hosted journal article supplement (https://gut.bmj.com/content/69/11/1925)

## Online Supplementary Appendix: Endoscopy News

# Risk of Transmission of COVID-19 Infection in Gastrointestinal Endoscopy

Alessandro Repici<sup>1</sup>, MD, Giovanni Aragona<sup>2</sup>, MD, Gianpaolo Cengia<sup>3</sup>, MD,  
Paolo Cantù<sup>4</sup>, MD, Marco Spadaccini<sup>1</sup>, MD, Roberta Maselli<sup>1</sup>, MD, PhD,  
Silvia Carrara<sup>1</sup>, MD, Andrea Anderloni<sup>1</sup>, MD, PhD, Alessandro Fugazza<sup>1</sup> MD, Fabio Pace<sup>5</sup> MD,  
Thomas Rösch<sup>6</sup>, MD, on behalf of the ITALIAN GI-COVID19 Working Group

**Corresponding author:**

Alessandro Repici, MD  
Humanitas Research Hospital and University, Rozzano, Italy  
Via Manzoni 56, 20089 Rozzano (Milan), Italy  
Tel: +39 (0)282247493  
Fax: +390282247493  
e-mail: [alessandro.repici@hunimed.eu](mailto:alessandro.repici@hunimed.eu)

**ITALIAN GI-COVID19 Working Group**

| <b>Name</b>              | <b>Affiliation</b>                  | <b>City, Country</b>       |
|--------------------------|-------------------------------------|----------------------------|
| Roberto, Gabbiadini      | Humanitas Research Hospital         | Rozzano, Italy             |
| Matteo, Colombo          | Humanitas Research Hospital         | Rozzano, Italy             |
| Piera Alessia, Galtieri  | Humanitas Research Hospital         | Rozzano, Italy             |
| Gaia, Pellegatta         | Humanitas Research Hospital         | Rozzano, Italy             |
| Cesare, Hassan           | Nuovo Regina Margherita Hospital    | Rome, Italy                |
| Giulio, Antonelli        | Nuovo Regina Margherita Hospital    | Rome, Italy                |
| Fabio, Pace              | Bolognini Hospital                  | Seriate, Italy             |
| Massimiliano, Mutignani  | Niguarda-Ca' Granda Hospital        | Milan, Italy               |
| Armando, Gabbrielli      | University Hospital of Verona       | Verona, Italy              |
| Clementina, Signorelli   | ASST Bergamo Ovest                  | Bergamo, Italy             |
| Cristiano, Spada         | Fondazione Poliambulanza            | Brescia, Italy             |
| Piera, Leoni             | Hospital of Lodi                    | Lodi, Italy                |
| Carlo, Fabbri            | Hospital of Forlì                   | Forlì, Italy               |
| Sergio, Segato           | ASST Dei Sette Laghi                | Varese, Italy              |
| Nicola, Gaffuri          | Humanitas Gavazzeni                 | Bergamo, Italy             |
| Benedetto, Mangiavillano | Humanitas Mater Domini              | Castellanza, Italy         |
| Franco, Radaelli         | Valduce Hospital                    | Como, Italy                |
| Raffaele, Salerno        | ASST Fatebenefratelli Sacco         | Milan, Italy               |
| Stefano, Bargiggia       | Clinica San Carlo                   | Milan, Italy               |
| Antonio, Benedetti       | Università Politecnica delle Marche | Ancona, Italy              |
| Petro, Occhipinti        | Maggiore Della Carità Hospital      | Novara, Italy              |
| Federico, De Grazia      | IRCCS Policlinico San Matteo        | Pavia, Italy               |
| Luca, Ferraris           | ASST Valleolona                     | Gallarate, Italy           |
| Salvatore, Greco         | Papa Giovanni XXIII Hospital        | Bergamo, Italy             |
| Costanza, Alvisi         | ASST Pavia                          | Pavia, Italy               |
| Antonella, Scarcelli     | Ospedali Riuniti Marche Nord        | Pesaro, Italy              |
| Luca, De Luca            | Ospedali Riuniti Marche Nord        | Fano, Italy                |
| Fabrizio, Cereatti       | Hospital of Cremona                 | Cremona, Italy             |
| Pier Alberto, Testoni    | IRCCS San Raffaele                  | Milan, Italy               |
| Roberto, Mingotto        | ASST Melegnano-Martesana            | Melegnano, Italy           |
| Gianpiero, Manes         | ASST Rhodense                       | Garbagnate Milanese, Italy |
| Paolo, Beretta           | Istituto Clinico Città Studi        | Milan, Italy               |
| Georgios, Amvrosiadis    | Policlinico San Marco               | Zingonia, Italy            |
| Vincenzo, Cennamo        | Bellaria-Maggiore Hospital          | Bologna, Italy             |
| Fausto, Lella            | Policlinico San Pietro              | Bergamo, Italy             |
| Guido, Missale           | ASST Spedali Civili                 | Brescia, Italy             |
| Pavlos, Lagoussis        | IRCCS Policlinico San Donato        | San Donato Milanese, Italy |
| Omero, Triossi           | AUSL Romagna                        | Ravenna, Italy             |
| Mauro, Giovanardi        | Hospital of Rimini                  | Rimini, Italy              |
| Giuseppe, De Roberto     | European Institute of Oncology      | Milan, Italy               |
| Elisabetta, Buscarini    | Maggiore Hospital                   | Crema, Italy               |
| Marco, Dinelli           | San Gerardo Hospital                | Monza, Italy               |
| Prateek, Sharma          | University of Kansas                | Kansas City, USA           |

## SUPPLEMENTARY TABLES

**Table S1. Patient questionnaire**

| <b>Endoscopy data</b>    |                    |                   |                                           |
|--------------------------|--------------------|-------------------|-------------------------------------------|
| Date of endoscopy        |                    |                   | day/month/year                            |
| Type of procedure        |                    |                   | see text                                  |
| Indication for procedure |                    |                   | Free text                                 |
| <b>Patient data</b>      |                    |                   |                                           |
| Date of follow-up call   |                    |                   |                                           |
| Patient age              |                    |                   | year                                      |
| Patient sex              |                    |                   | male/female                               |
| Comorbidities            |                    |                   | Free text                                 |
| Development of symptoms  |                    |                   |                                           |
|                          | Fever              | YES/NO            | If yes, temperature<br>If yes since when* |
|                          | Cough              | YES/NO            | If yes since when                         |
|                          | Dyspnea            | YES/NO            | If yes since when                         |
|                          | Sore throat        | YES/NO            | If yes since when                         |
|                          | GI symptoms        | YES/NO            | If yes since when<br>If yes, which **     |
|                          | Hospital admission | YES/NO            | If yes since when<br>If yes, reason **    |
| COVID testing            |                    |                   |                                           |
|                          | Done?              | YES/NO            | If yes since when                         |
|                          | If yes result      | POSITIVE/NEGATIVE | Date of test                              |

\* starting date and if applicable duration

\*\* free text entry

**Table S2:** Overview on endoscopies performed during the COVID-19 outbreak in one large referral hospital with follow-up information (n=802; 94.2% of all cases)

| <i>Type of procedures</i> | <i>Number of patients</i> | <i>of those, therapeutic/emergency</i> | <i>COVID-positive</i> | <i>Respiratory symptoms</i> |
|---------------------------|---------------------------|----------------------------------------|-----------------------|-----------------------------|
| Upper GI endoscopy        | 207                       | 30/16                                  | 1                     | x                           |
| Lower GI endoscopy        | 509                       | 38/2                                   | 0                     | x                           |
| ERCP                      | 67                        | 66/1                                   | 0                     | x                           |
| EUS                       | 68                        | 10*/0                                  | 0                     | x                           |

\* 6 HotAxios for periluminal collections, 3 EUS-guided biliary drainage, 1 G-J anastomosis.

The total number of patients endoscoped was n=851 (all scoped only once, mean age 56.7 year (range 22-84); 547 were male. We excluded one patient known as COVID positive from this list, who was admitted in the hospital for bleeding varices and treated with band ligation. 802 patients could be reached for the follow-up interview (see text).

**Table S3: Questionnaire to endoscopy units shown in Figure S2**

| <b>Question</b>                     | <b>Reply</b>                         |
|-------------------------------------|--------------------------------------|
| Number of annual procedures         | > or < 5000                          |
| No. of HCW in unit                  | N                                    |
| Characterization of HCW             | Physician/Nurse/Healthcare assistant |
| No. of infected HCW (pos. test)     | N                                    |
| Characterization of infected HCW    | Physician/Nurse/Healthcare assistant |
| Of those, hospital admission        | N                                    |
| Of those, discharge                 | N                                    |
| Introduction of PPE after March 8   | Yes/No                               |
| Case volume reduction after March 8 | Yes/No                               |

This questionnaire is a part of a larger web survey about COVID-19 practices in Northern Italy (Repici et al. Burden on Endoscopy Units by COVID-19 Outbreak; submitted) and was expanded for this analysis.

**SUPPLEMENTARY FIGURES****Figure S1: Distribution of COVID-19 in endoscopy units**

Figure S1 shows the geographical distribution of GI endoscopy units reporting COVID-19 infections and the number of infected individuals among their staff in Northern Italy.

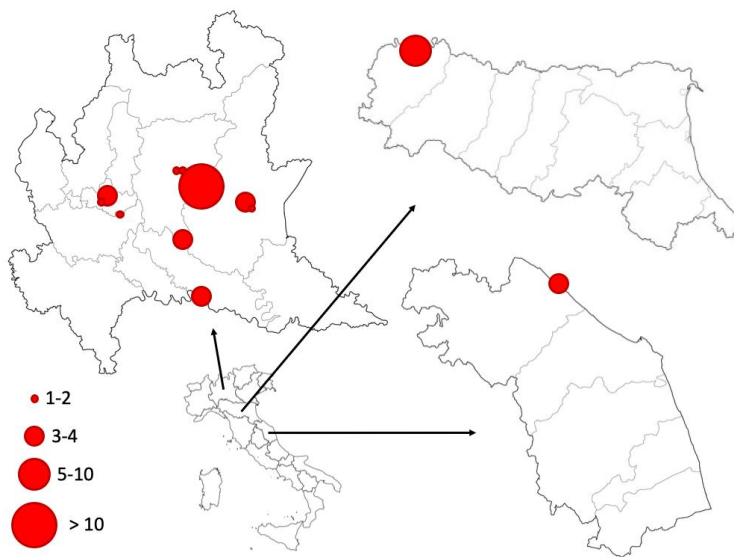

**Figure S2: Time course of endoscopic case load in a tertiary referral endoscopy unit**

Figure S2 shows the course of endoscopy examinations performed during the study period. After the 3<sup>rd</sup> week of February, it was decided to decrease the case load and focus on emergency and essential endoscopies to reduce the risk of COVID-19.

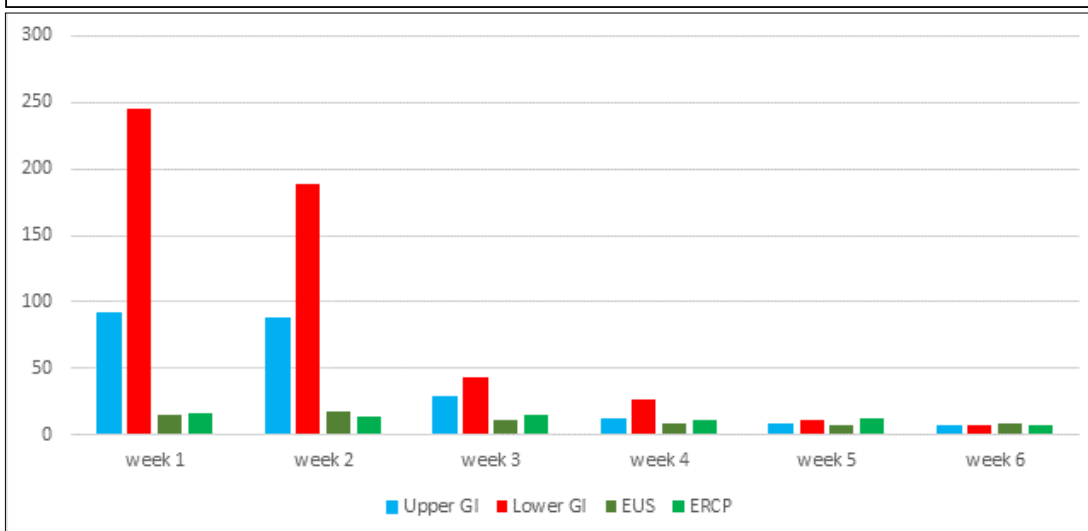

Supplement: inline-supplementary-material-1 [file inline-supplementary-material-1.pdf]
